# Supplementary material
Source: publisher figshare collection journal article supplement (https://tandf.figshare.com/ndownloader/files/22097781)

**Appendix 1: Data collection questions**

**
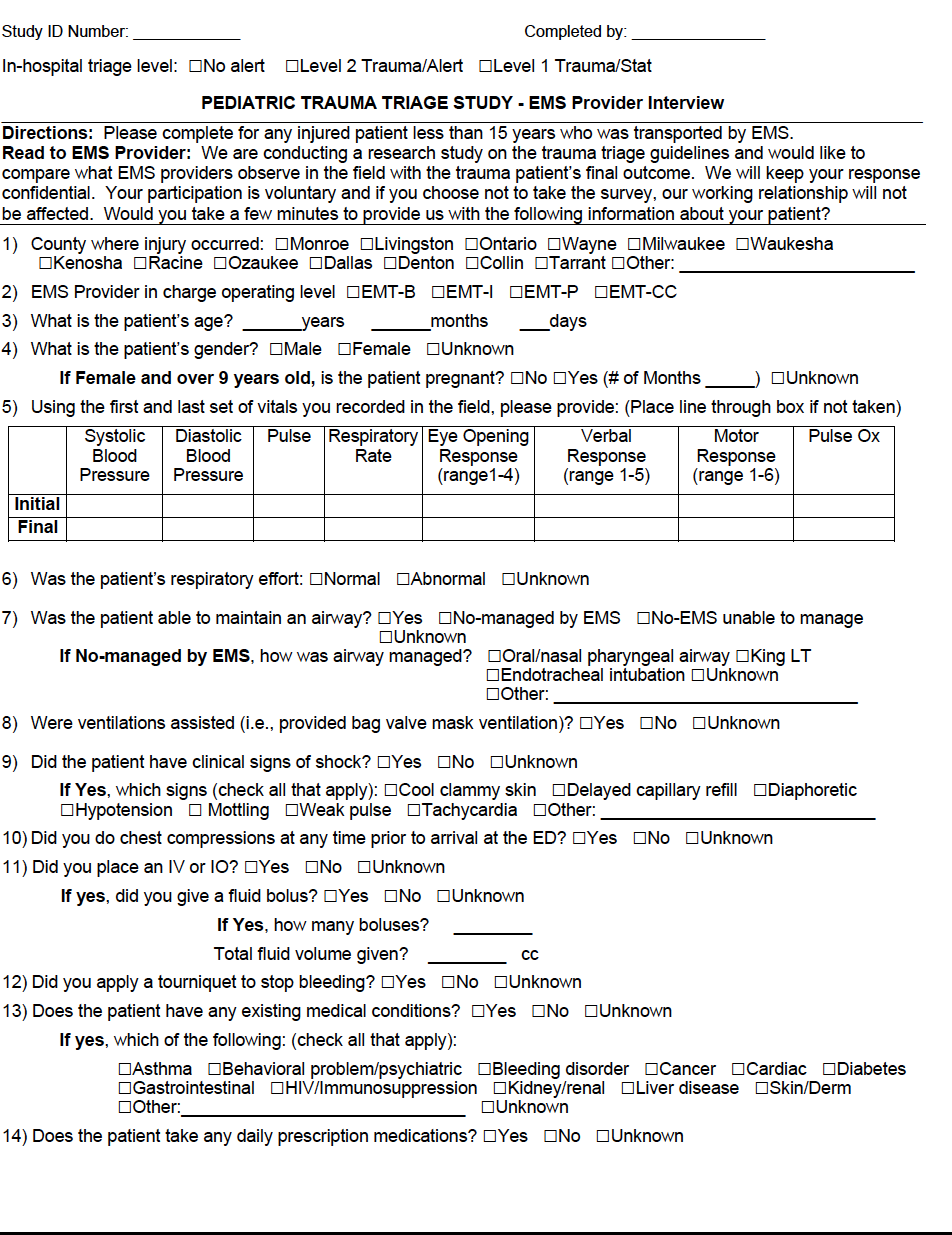
**

**
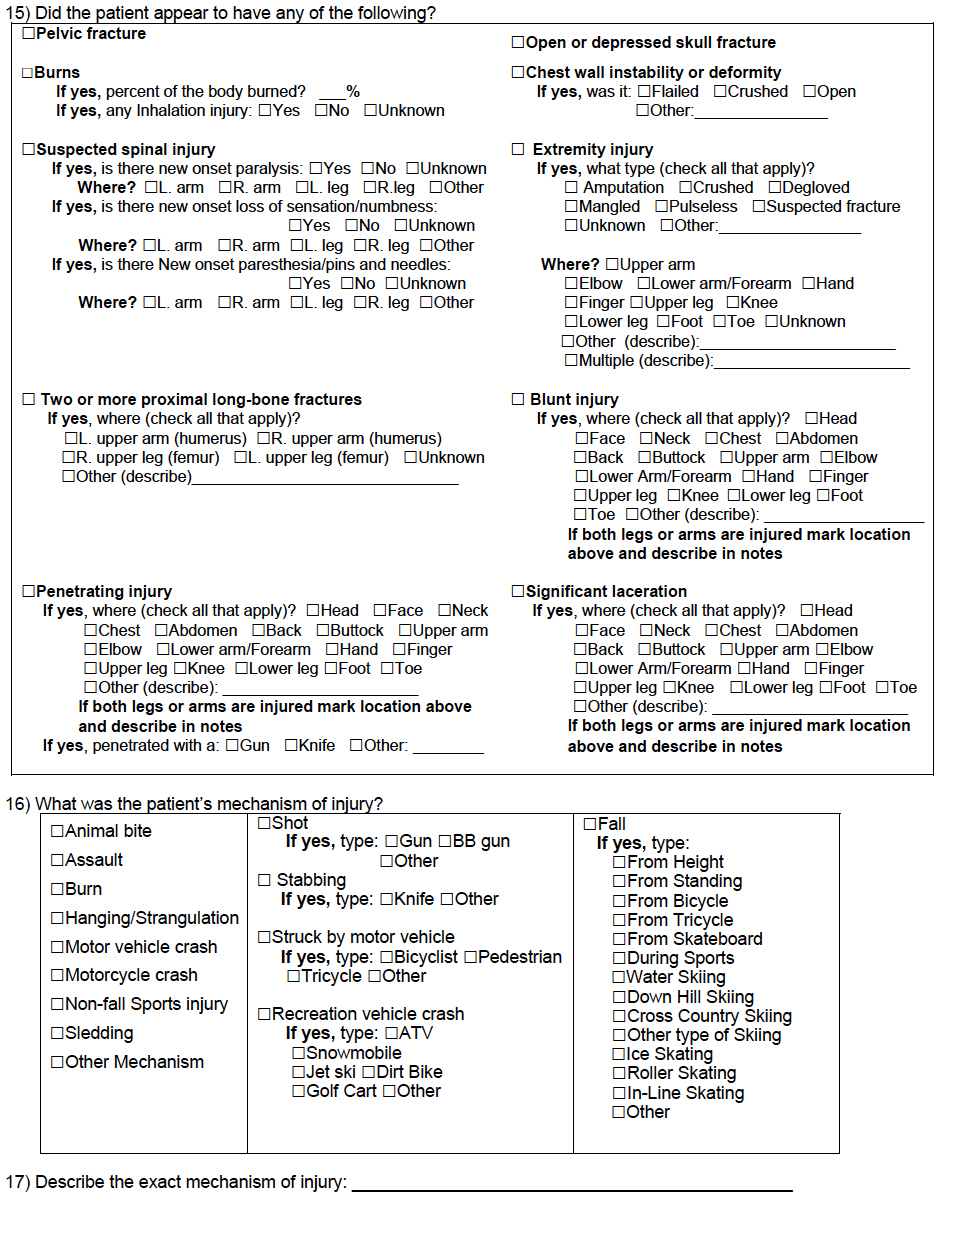
**

**
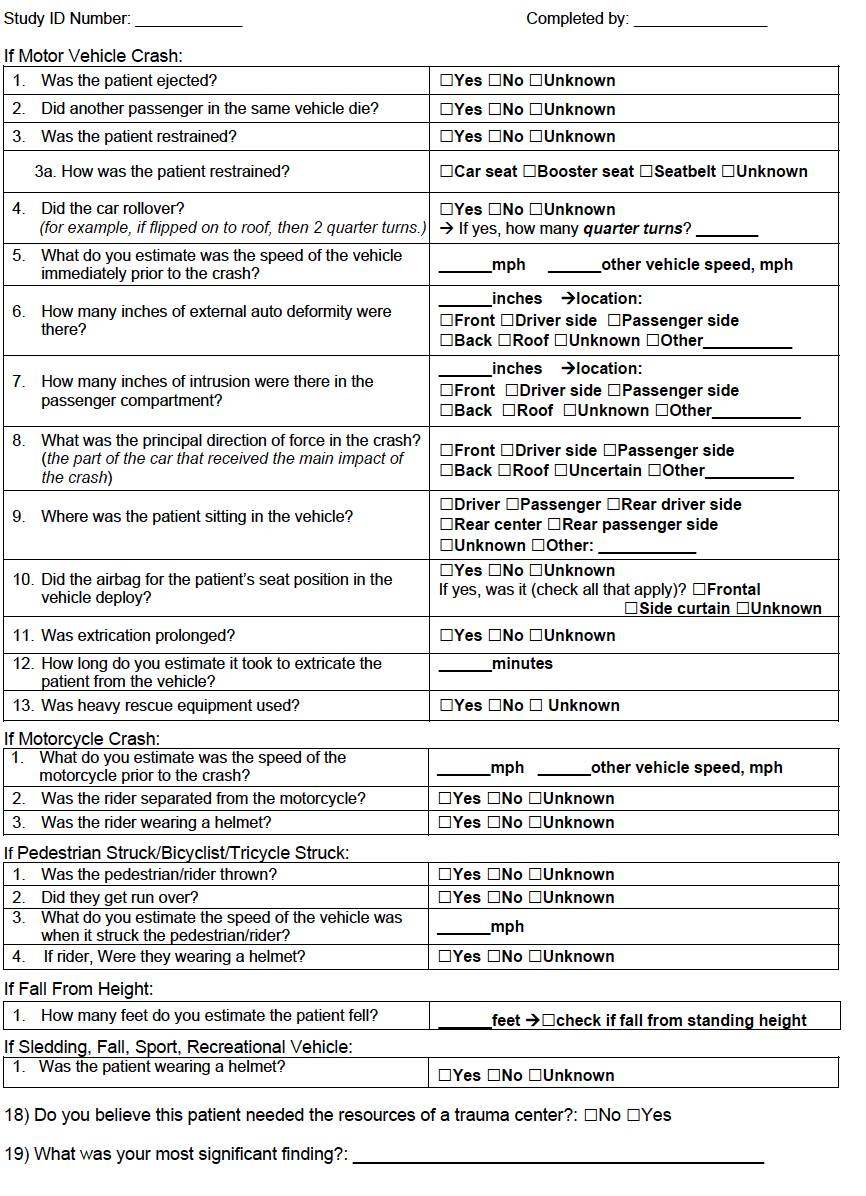
**

Supplement: Supplementary file 1 [file 22097781]
